# Supplementary material for: Effects of plasma activated water on fava bean protein isolate functionality and 3D printability
Source: Royal Society of Chemistry journal article supplement (doi:10.1039/d5fb00481k), 2025-10-27
Supplement: d5fb00481k1.pdf [file d5fb00481k1.pdf]

## Supplementary Information

Table S1 Prominent OES spectrum peaks for plasma jet reactor with 90:10 Ar: Air gas feed

| Ion            | Wavelength, $\lambda$ (nm) |
|----------------|----------------------------|
| N <sub>2</sub> | 379                        |
| N <sub>2</sub> | 399                        |
| N <sub>2</sub> | 405                        |
| Ar             | 696                        |
| Ar             | 750                        |
| Ar             | 763                        |
| Ar             | 772                        |
| Ar             | 800                        |
| Ar             | 811                        |
| Ar             | 826                        |
| Ar             | 841                        |

Table S2. Colorimetry results of DW-FBPI gels

|                           | <b>L*</b>                 |                           | <b>a*</b>                 |                           | <b>b*</b>                 |                           |
|---------------------------|---------------------------|---------------------------|---------------------------|---------------------------|---------------------------|---------------------------|
| <b>Gelling Conditions</b> | Control                   | Treated                   | Control                   | Treated                   | Control                   | Treated                   |
| <b>95°C - 30 min</b>      | 73.92 ± 0.67 <sup>a</sup> | 79.32 ± 0.8 <sup>b</sup>  | 0.18 ± 1.15 <sup>a</sup>  | -0.59 ± 0.16 <sup>a</sup> | 19.28 ± 0.92 <sup>a</sup> | 17.77 ± 0.57 <sup>a</sup> |
| <b>85°C - 30 min</b>      | 78.62 ± 0.62 <sup>a</sup> | 78.55 ± 0.50 <sup>a</sup> | -0.87 ± 0.34 <sup>a</sup> | -0.71 ± 0.39 <sup>a</sup> | 15.79 ± 0.68 <sup>a</sup> | 16.16 ± 1.08 <sup>a</sup> |
| <b>85°C - 1 h</b>         | 77.69 ± 0.70 <sup>a</sup> | 78.13 ± 0.25 <sup>a</sup> | -0.84 ± 0.43 <sup>a</sup> | -0.83 ± 0.17 <sup>a</sup> | 16.07 ± 0.56 <sup>a</sup> | 17.12 ± 1.36 <sup>a</sup> |
| <b>80°C - 1 h</b>         | 78.26 ± 1.87 <sup>a</sup> | 77.57 ± 0.36 <sup>a</sup> | -0.45 ± 0.39 <sup>a</sup> | -0.55 ± 0.20 <sup>a</sup> | 16.05 ± 0.92 <sup>a</sup> | 15.85 ± 0.08 <sup>a</sup> |

Values are expressed as the mean ± the standard deviation of three replicates. 1-way ANOVA was completed with the Tukey Test as post-hoc test. The alphabetical subscript (a,b) within each row and section indicates the values that are significantly different between control and treated ( $p < 0.05$ ).

Table S3.  $\Delta E$  values of DW-FBPI and DES-FBPI gels

| Sample   | Gelling<br>Conditions | Control                                                                             | Treated                                                                              | $\Delta E$      |
|----------|-----------------------|-------------------------------------------------------------------------------------|--------------------------------------------------------------------------------------|-----------------|
| DW-FBPI  | 95°C - 30 min         | 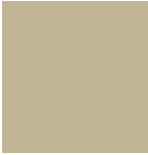   |    | $5.73 \pm 1.28$ |
| DW-FBPI  | 85°C - 30 min         |    |    | $1.69 \pm 0.93$ |
| DW-FBPI  | 85°C - 1 h            |   |   | $0.74 \pm 0.36$ |
| DW-FBPI  | 80°C - 1 h            |  |  | $1.56 \pm 0.41$ |
| DES-FBPI | 80°C - 1 h            |  |  | $2.44 \pm 0.94$ |
| DES-FBPI | 79°C - 1 h            |  |  | $1.73 \pm 1.10$ |

Table S4. Colorimetry results of DES-FBPI gels

|                               | <b>L*</b>                  |                         | <b>a*</b>                    |                              | <b>b*</b>                  |                            |
|-------------------------------|----------------------------|-------------------------|------------------------------|------------------------------|----------------------------|----------------------------|
| <b>Gelling<br/>Conditions</b> | Control                    | Treated                 | Control                      | Treated                      | Control                    | Treated                    |
| <b>80°C - 1h</b>              | 69.8 ±<br>0.8 <sup>a</sup> | 67.5 ± 1.3 <sup>a</sup> | -0.06 ±<br>0.22 <sup>a</sup> | -0.18 ±<br>0.31 <sup>a</sup> | 13.6 ±<br>0.4 <sup>a</sup> | 12.7 ±<br>0.4 <sup>b</sup> |
| <b>79°C - 1h</b>              | 71.4 ±<br>1.2 <sup>a</sup> | 71.2 ± 1.5 <sup>a</sup> | -1.19 ±<br>0.32 <sup>a</sup> | -1.17 ±<br>0.19 <sup>a</sup> | 14.9 ±<br>0.7 <sup>a</sup> | 14.9 ±<br>0.5 <sup>a</sup> |

Values are expressed as the mean ± the standard deviation of three replicates. 1-way ANOVA was completed with Tukey Test as post-hoc test. The alphabetical subscript (a,b) within each columnar section indicates the values that are significantly different between control and treated (p<0.05).

Table S5. Water holding capacity of DW-FBPI and DES-FBPI gels heated at various temperatures

| Sample   | Gelling Conditions | Treated (%)                | Control (%)                |
|----------|--------------------|----------------------------|----------------------------|
| DW-FBPI  | 85°C 1 h           | 88.7 ± 4.5 <sup>a, A</sup> | 85.4 ± 3.6 <sup>a, A</sup> |
| DW-FBPI  | 80°C 1 h           | 94.0 ± 3.6 <sup>a, B</sup> | 93.6 ± 1.1 <sup>a, B</sup> |
| DES-FBPI | 95°C 30 min        | 82.0 ± 3.3 <sup>a, A</sup> | 77.3 ± 2.5 <sup>a, A</sup> |
| DES-FBPI | 85°C 30 min        | 91.5 ± 1.9 <sup>a, B</sup> | 89.7 ± 6.0 <sup>a, B</sup> |
| DES-FBPI | 80°C 1 h           | 99.0 ± 0.0 <sup>a, A</sup> | 98.6 ± 0.1 <sup>a, A</sup> |
| DES-FBPI | 79°C 1 h           | 99.0 ± 0.0 <sup>a, A</sup> | 99.2 ± 0.6 <sup>a, A</sup> |

Values are expressed as the mean ± the standard deviation of three replicates. 2-way ANOVA was completed with the Tukey Test as post-hoc test. The first alphabetical subscript (a,b) within each columnar section indicates the values that are significantly different between control and treated ( $p < 0.05$ ). The second alphabetical subscript (A, B) indicates a significant difference between gelling conditions. ( $p < 0.05$ )

Table S6 Power law parameters from equations (4) and (5) from treated DW-FBPI gels

| Temperature | Gelling time | Sample  | $G_o'$ (kPa)   | $n_o'$          | $G_o''$ (kPa) | $n_o''$         |
|-------------|--------------|---------|----------------|-----------------|---------------|-----------------|
| 95°C        | 30 min       | Treated | $7.02 \pm$     | $0.115 \pm$     | $1.56 \pm$    | $0.111 \pm$     |
|             |              |         | $2.28^{a, A}$  | $0.003^{a, A}$  | $0.49^{a, A}$ | $0.007^{b, B}$  |
|             | 30 min       | Control | $4.16 \pm$     | $0.114 \pm$     | $0.87 \pm$    | $0.119 \pm$     |
|             |              |         | $0.47^{b, A}$  | $0.004^{ab, A}$ | $0.11^{b, A}$ | $0.006^{ab, B}$ |
| 85°C        | 30 min       | Treated | $2.53 \pm$     | $0.106 \pm$     | $0.51 \pm$    | $0.123 \pm$     |
|             |              |         | $0.94^{b, B}$  | $0.002^{b, B}$  | $0.18^{b, B}$ | $0.001^{ab, A}$ |
|             | 30 min       | Control | $2.86 \pm$     | $0.105 \pm$     | $0.57 \pm$    | $0.124 \pm$     |
|             |              |         | $1.10^{b, B}$  | $0.006^{b, B}$  | $0.20^{b, B}$ | $0.004^{a, A}$  |
| 85°C        | 1 h          | Treated | $3.16 \pm$     | $0.106 \pm$     | $0.62 \pm$    | $0.123 \pm$     |
|             |              |         | $0.39^{a*, A}$ | $0.002^{a, A}$  | $0.08^{a, A}$ | $0.002^{aA}$    |
|             | 1 h          | Control | $2.46 \pm$     | $0.105 \pm$     | $0.49 \pm$    | $0.125 \pm$     |
|             |              |         | $0.08^{b*, A}$ | $0.01^{a, A}$   | $0.01^{b, A}$ | $0.005^{aA}$    |

|      |     |         |                       |                       |                      |                     |
|------|-----|---------|-----------------------|-----------------------|----------------------|---------------------|
| 80°C | 1 h | Treated | 1.19 ±                | 0.120 ±               | 0.28 ±               | 0.137 ±             |
|      |     |         | 0.23 <sup>c*, B</sup> | 0.001 <sup>b, B</sup> | 0.05 <sup>c, B</sup> | 0.003 <sup>bB</sup> |
|      | 1 h | Control | 1.36 ±                | 0.122 ±               | 0.32 ±               | 0.139 ±             |
|      |     |         | 0.09 <sup>c*, B</sup> | 0.003 <sup>b, B</sup> | 0.02 <sup>c, B</sup> | 0.003 <sup>bB</sup> |

Values are expressed as the mean ± the standard deviation of three replicates. 2-way ANOVA was completed with Tukey Test as post-hoc test. The first alphabetical subscript (a,b) within each column indicates the values that are significantly different (p<0.05). The second alphabetical subscript (A,B) indicates a significant difference between gel temperatures. (p<0.05)

Table S7 Power law parameters from equations (4) and (5) from treated DES-FBPI gels heated  
for 1 h

| Sample                          | Gelling<br>Conditions | $G_o'$ (kPa)      | $n_o'$                   | $G_o''$ (kPa)     | $n_o''$                  |
|---------------------------------|-----------------------|-------------------|--------------------------|-------------------|--------------------------|
| <b>Treated – 30<br/>min PAW</b> | 80°C                  | $1.03 \pm 0.20^a$ | $0.120 \pm$<br>$0.006^a$ | $0.22 \pm 0.04^a$ | $0.149 \pm$<br>$0.005^a$ |
| <b>Control</b>                  | 80°C                  | $1.03 \pm 0.44^a$ | $0.122 \pm$<br>$0.003^a$ | $0.23 \pm 0.09^a$ | $0.153 \pm$<br>$0.006^a$ |
| <b>Treated – 8<br/>min PAW</b>  | 79°C                  | $0.61 \pm 0.09^a$ | $0.153 \pm$<br>$0.006^a$ | $0.16 \pm 0.02^a$ | $0.172 \pm$<br>$0.002^a$ |
| <b>Control</b>                  | 79°C                  | $0.39 \pm 0.04^b$ | $0.151 \pm$<br>$0.004^b$ | $0.10 \pm 0.02^b$ | $0.170 \pm$<br>$0.002^b$ |

Values are expressed as the mean  $\pm$  the standard deviation of three replicates. 1-way ANOVA was completed with Tukey Test as post-hoc test. The alphabetical subscript (a,b) within each column indicates the values that are significantly different between control and treated ( $p < 0.05$ ).



Table S8 Measured shape data of treated DW-FBPI 3D printed structures.

| <b>Gel Temperature (°C)</b> | <b>Treatment</b> | <b>Bottom: Top Ratio</b> | <b>Bottom: Top Ratio, after 24 h</b> | <b>Bottom Area</b>          | <b>Bottom Area after 24 h</b> |
|-----------------------------|------------------|--------------------------|--------------------------------------|-----------------------------|-------------------------------|
| <b>85°C for 1 h</b>         | Control          | 1.16 ± 0.08 <sup>a</sup> | 1.17 ± 0.08 <sup>a</sup>             | 9.866 ± 0.591 <sup>a</sup>  | 9.618 ± 0.715 <sup>a</sup>    |
|                             | Treated          | 1.13 ± 0.01 <sup>a</sup> | 1.17 ± 0.03 <sup>a</sup>             | 9.626 ± 0.522 <sup>a</sup>  | 9.674 ± 0.412 <sup>a</sup>    |
| <b>85°C for 30 min</b>      | Control          | 1.16 ± 0.04 <sup>a</sup> | 1.17 ± 0.04 <sup>a</sup>             | 9.886 ± 0.925 <sup>a</sup>  | 9.687 ± 0.582 <sup>a</sup>    |
|                             | Treated          | 1.14 ± 0.03 <sup>a</sup> | 1.19 ± 0.02 <sup>a</sup>             | 10.009 ± 0.526 <sup>a</sup> | 9.956 ± 0.457 <sup>a</sup>    |
| <b>80°C for 1 h</b>         | Control          | 1.20 ± 0.03 <sup>a</sup> | 1.20 ± 0.03 <sup>a</sup>             | 10.208 ± 0.305 <sup>a</sup> | 9.900 ± 0.140 <sup>a</sup>    |
|                             | Treated          | 1.20 ± 0.05 <sup>a</sup> | 1.18 ± 0.03 <sup>a</sup>             | 9.879 ± 0.546 <sup>a</sup>  | 10.091 ± 0.586 <sup>a</sup>   |

Values are expressed as the mean ± the standard deviation of three replicates. 1-way ANOVA was completed with Tukey Test as post-hoc test. The alphabetical subscript (a,b) within each gel temperature indicates the values that are significantly different between control and treated (p<0.05).

Table S9 Measured shape data of treated DES-FBPI 3D printed structures.

| <b>Gel Temperature (°C)</b> | <b>Treatment</b> | <b>Bottom: Top Ratio</b> | <b>Bottom: Top Ratio, after 24 hours</b> | <b>Bottom Area</b>  | <b>Bottom Area after 24 hours</b> |
|-----------------------------|------------------|--------------------------|------------------------------------------|---------------------|-----------------------------------|
| <b>80°C for 1 h</b>         | Control          | $1.17 \pm 0.03^a$        | $1.24 \pm 0.04^a$                        | $8.413 \pm 0.584^a$ | $8.416 \pm 0.370^a$               |
|                             | Treated          | $1.17 \pm 0.05^a$        | $1.25 \pm 0.04^a$                        | $8.468 \pm 0.754^a$ | $8.650 \pm 0.561^a$               |
| <b>79°C for 1 h</b>         | Control          | $1.31 \pm 0.06^a$        | $1.43 \pm 0.13^a$                        | $8.766 \pm 0.343^a$ | $9.001 \pm 0.563^a$               |
|                             | Treated          | $1.33 \pm 0.06^a$        | $1.39 \pm 0.11^a$                        | $8.668 \pm 0.743^a$ | $8.665 \pm 0.448^a$               |

Values are expressed as the mean  $\pm$  the standard deviation of three replicates. 1-way ANOVA was completed with Tukey Test as post-hoc test. The alphabetical subscript (a,b) within each gel temperature indicates the values that are significantly different between control and treated ( $p < 0.05$ ).
